# Supplementary figures and images for: Theoretical approach to the design of supramolecular conjugated porphyrin polymers
Source: Royal Society of Chemistry journal article supplement (doi:10.1039/b102614n), 2001-01-01

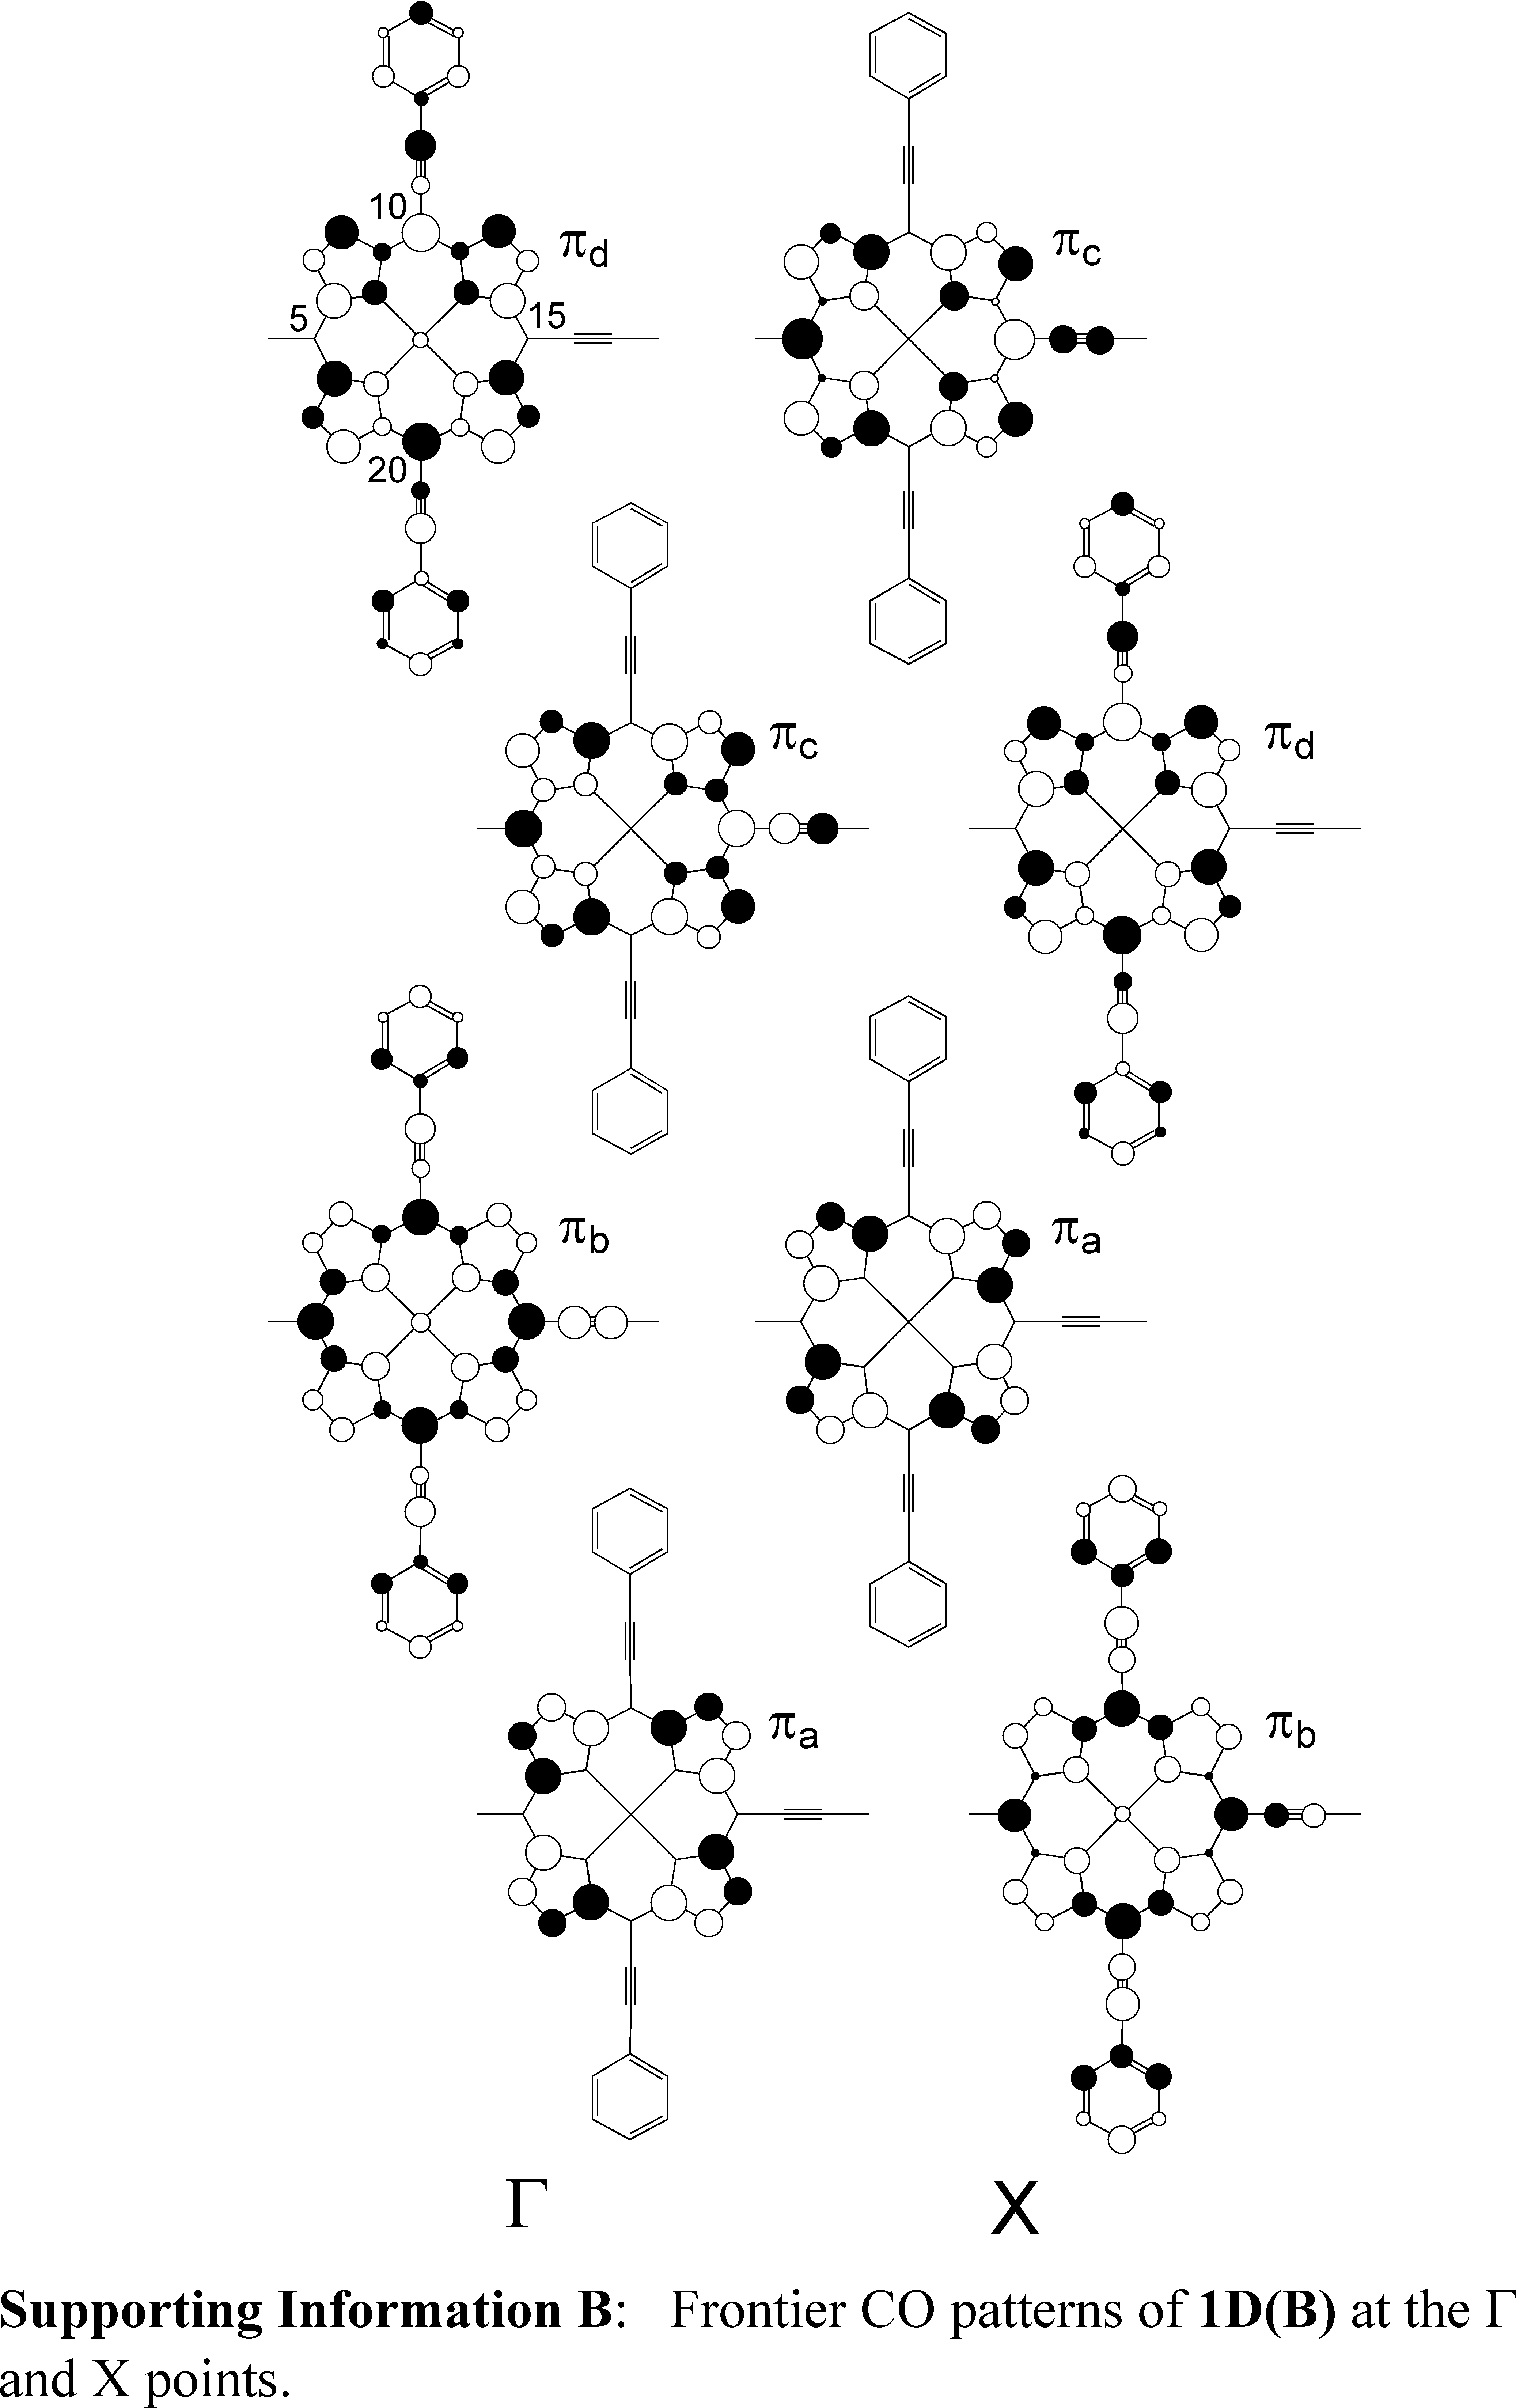

Supplement: b102614nb.doc [file b102614nb.doc]

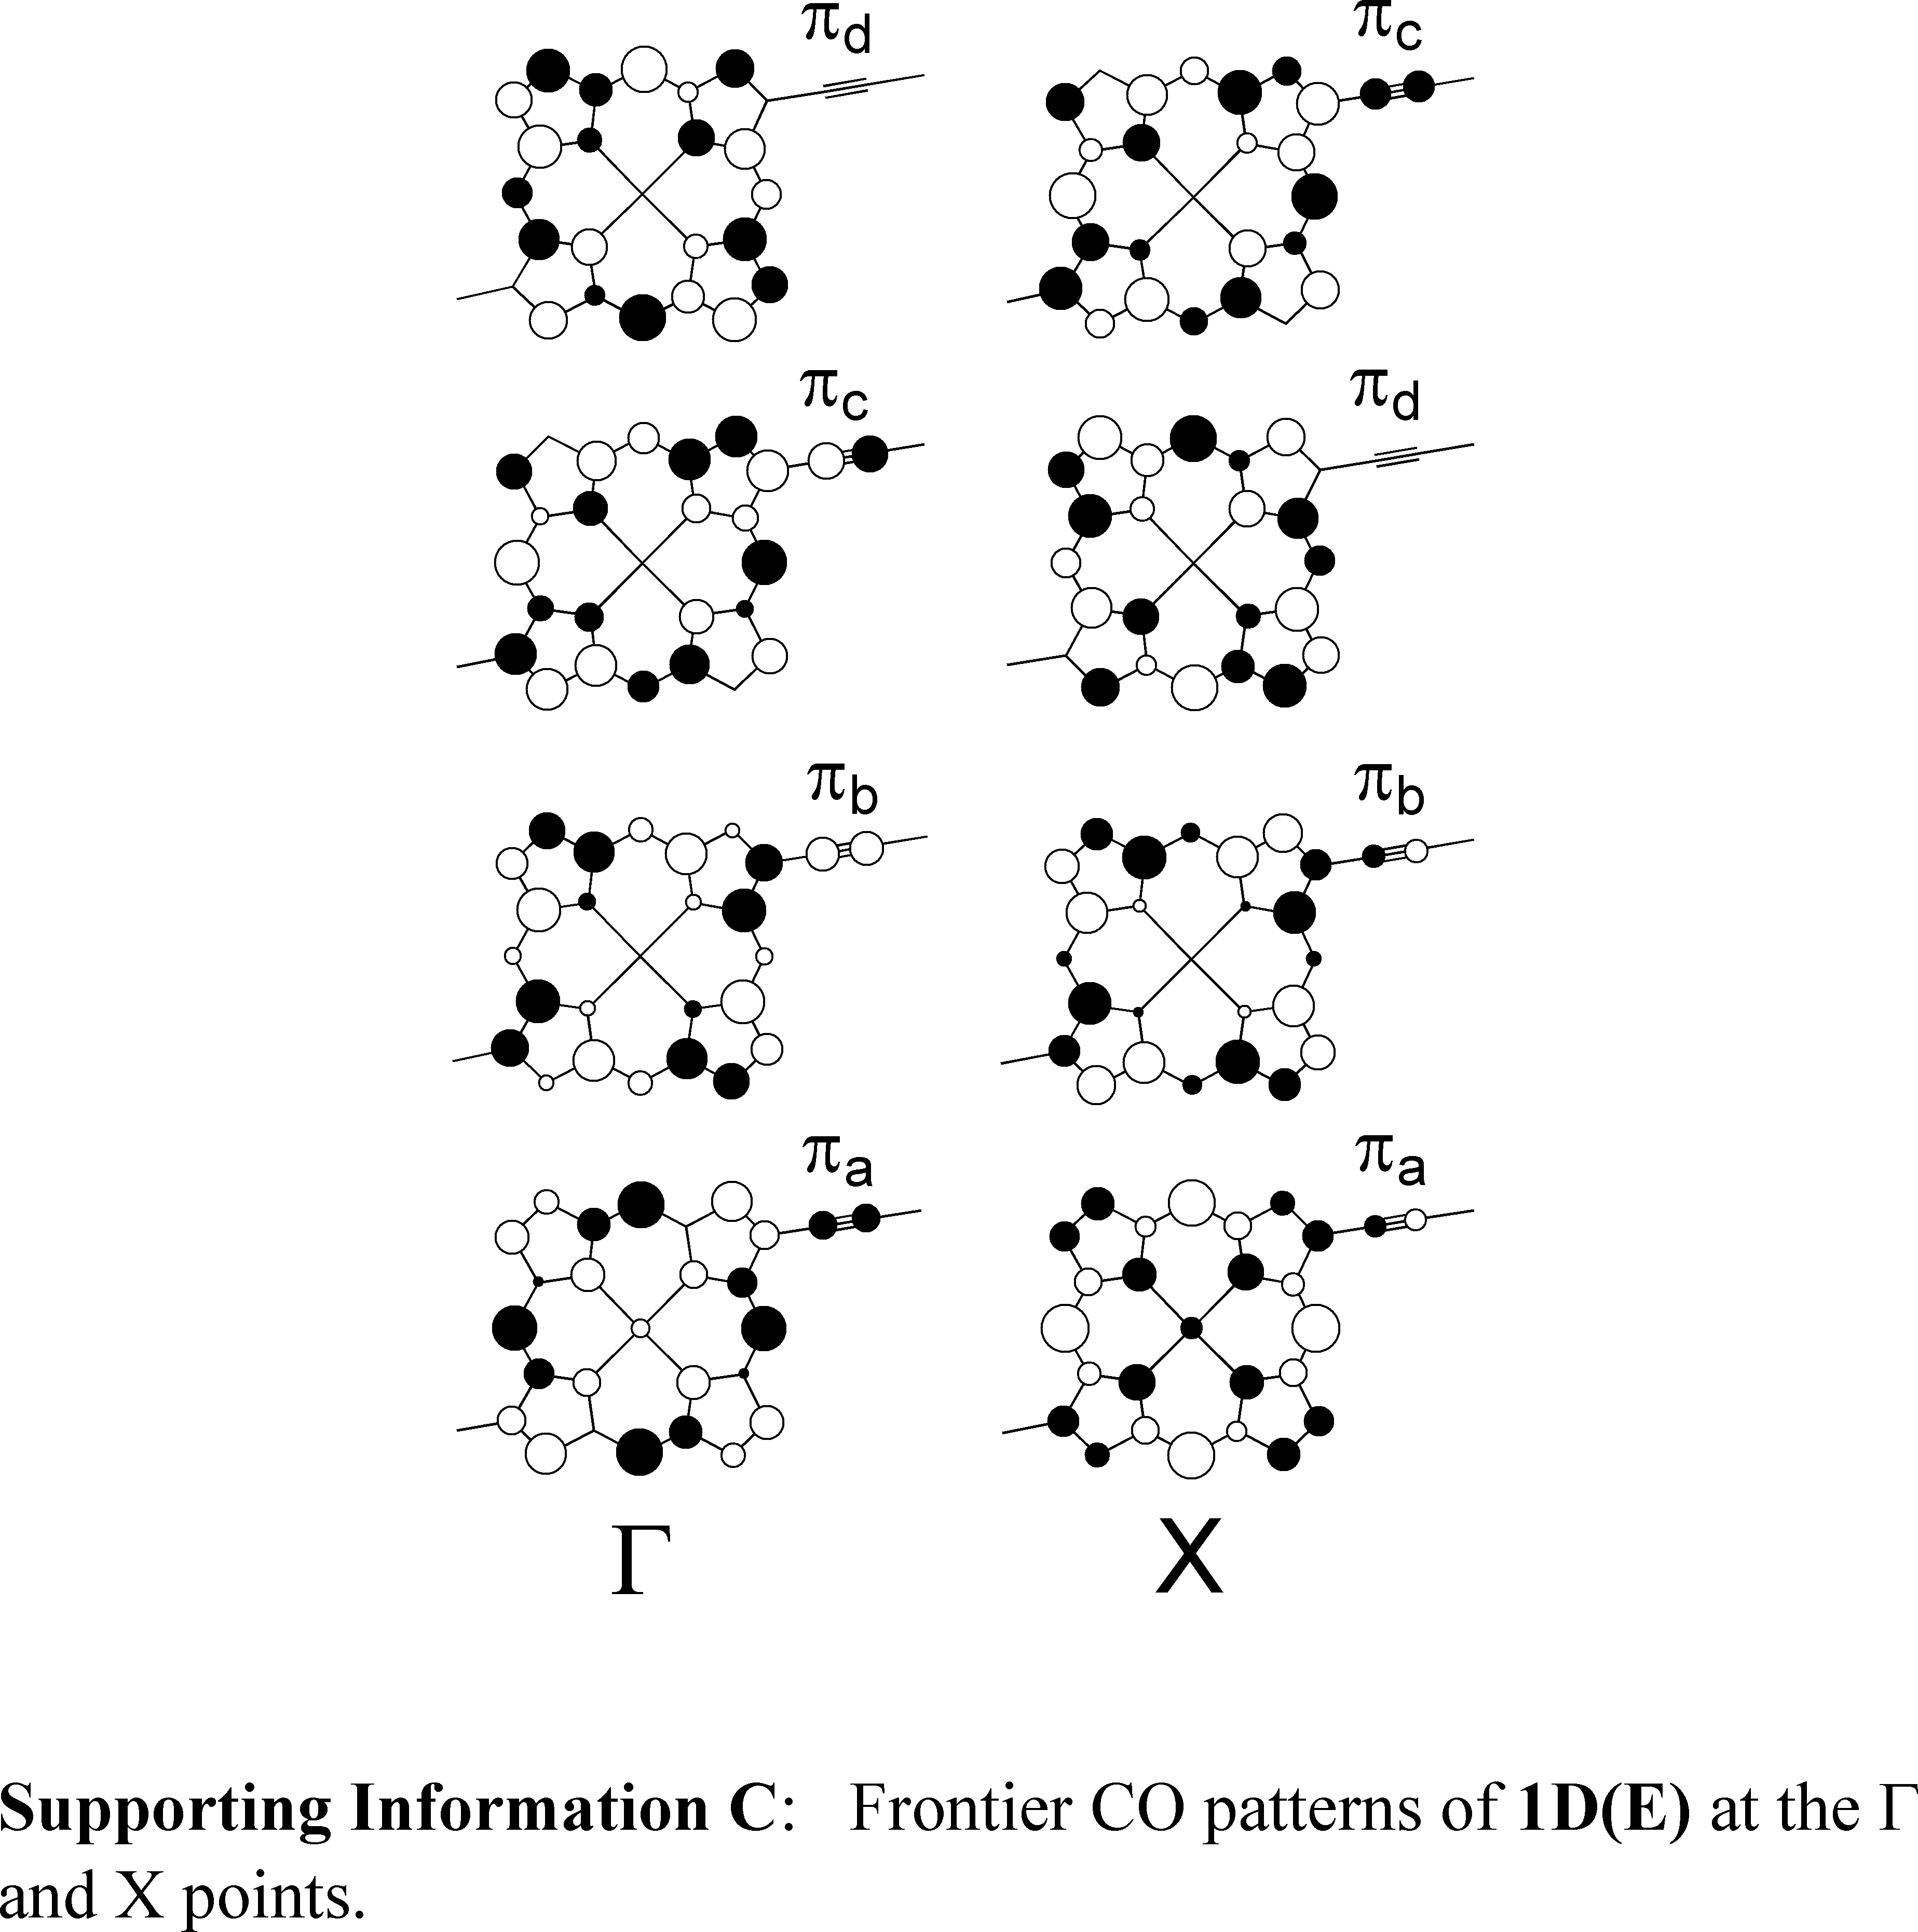

Supplement: b102614nc.doc [file b102614nc.doc]

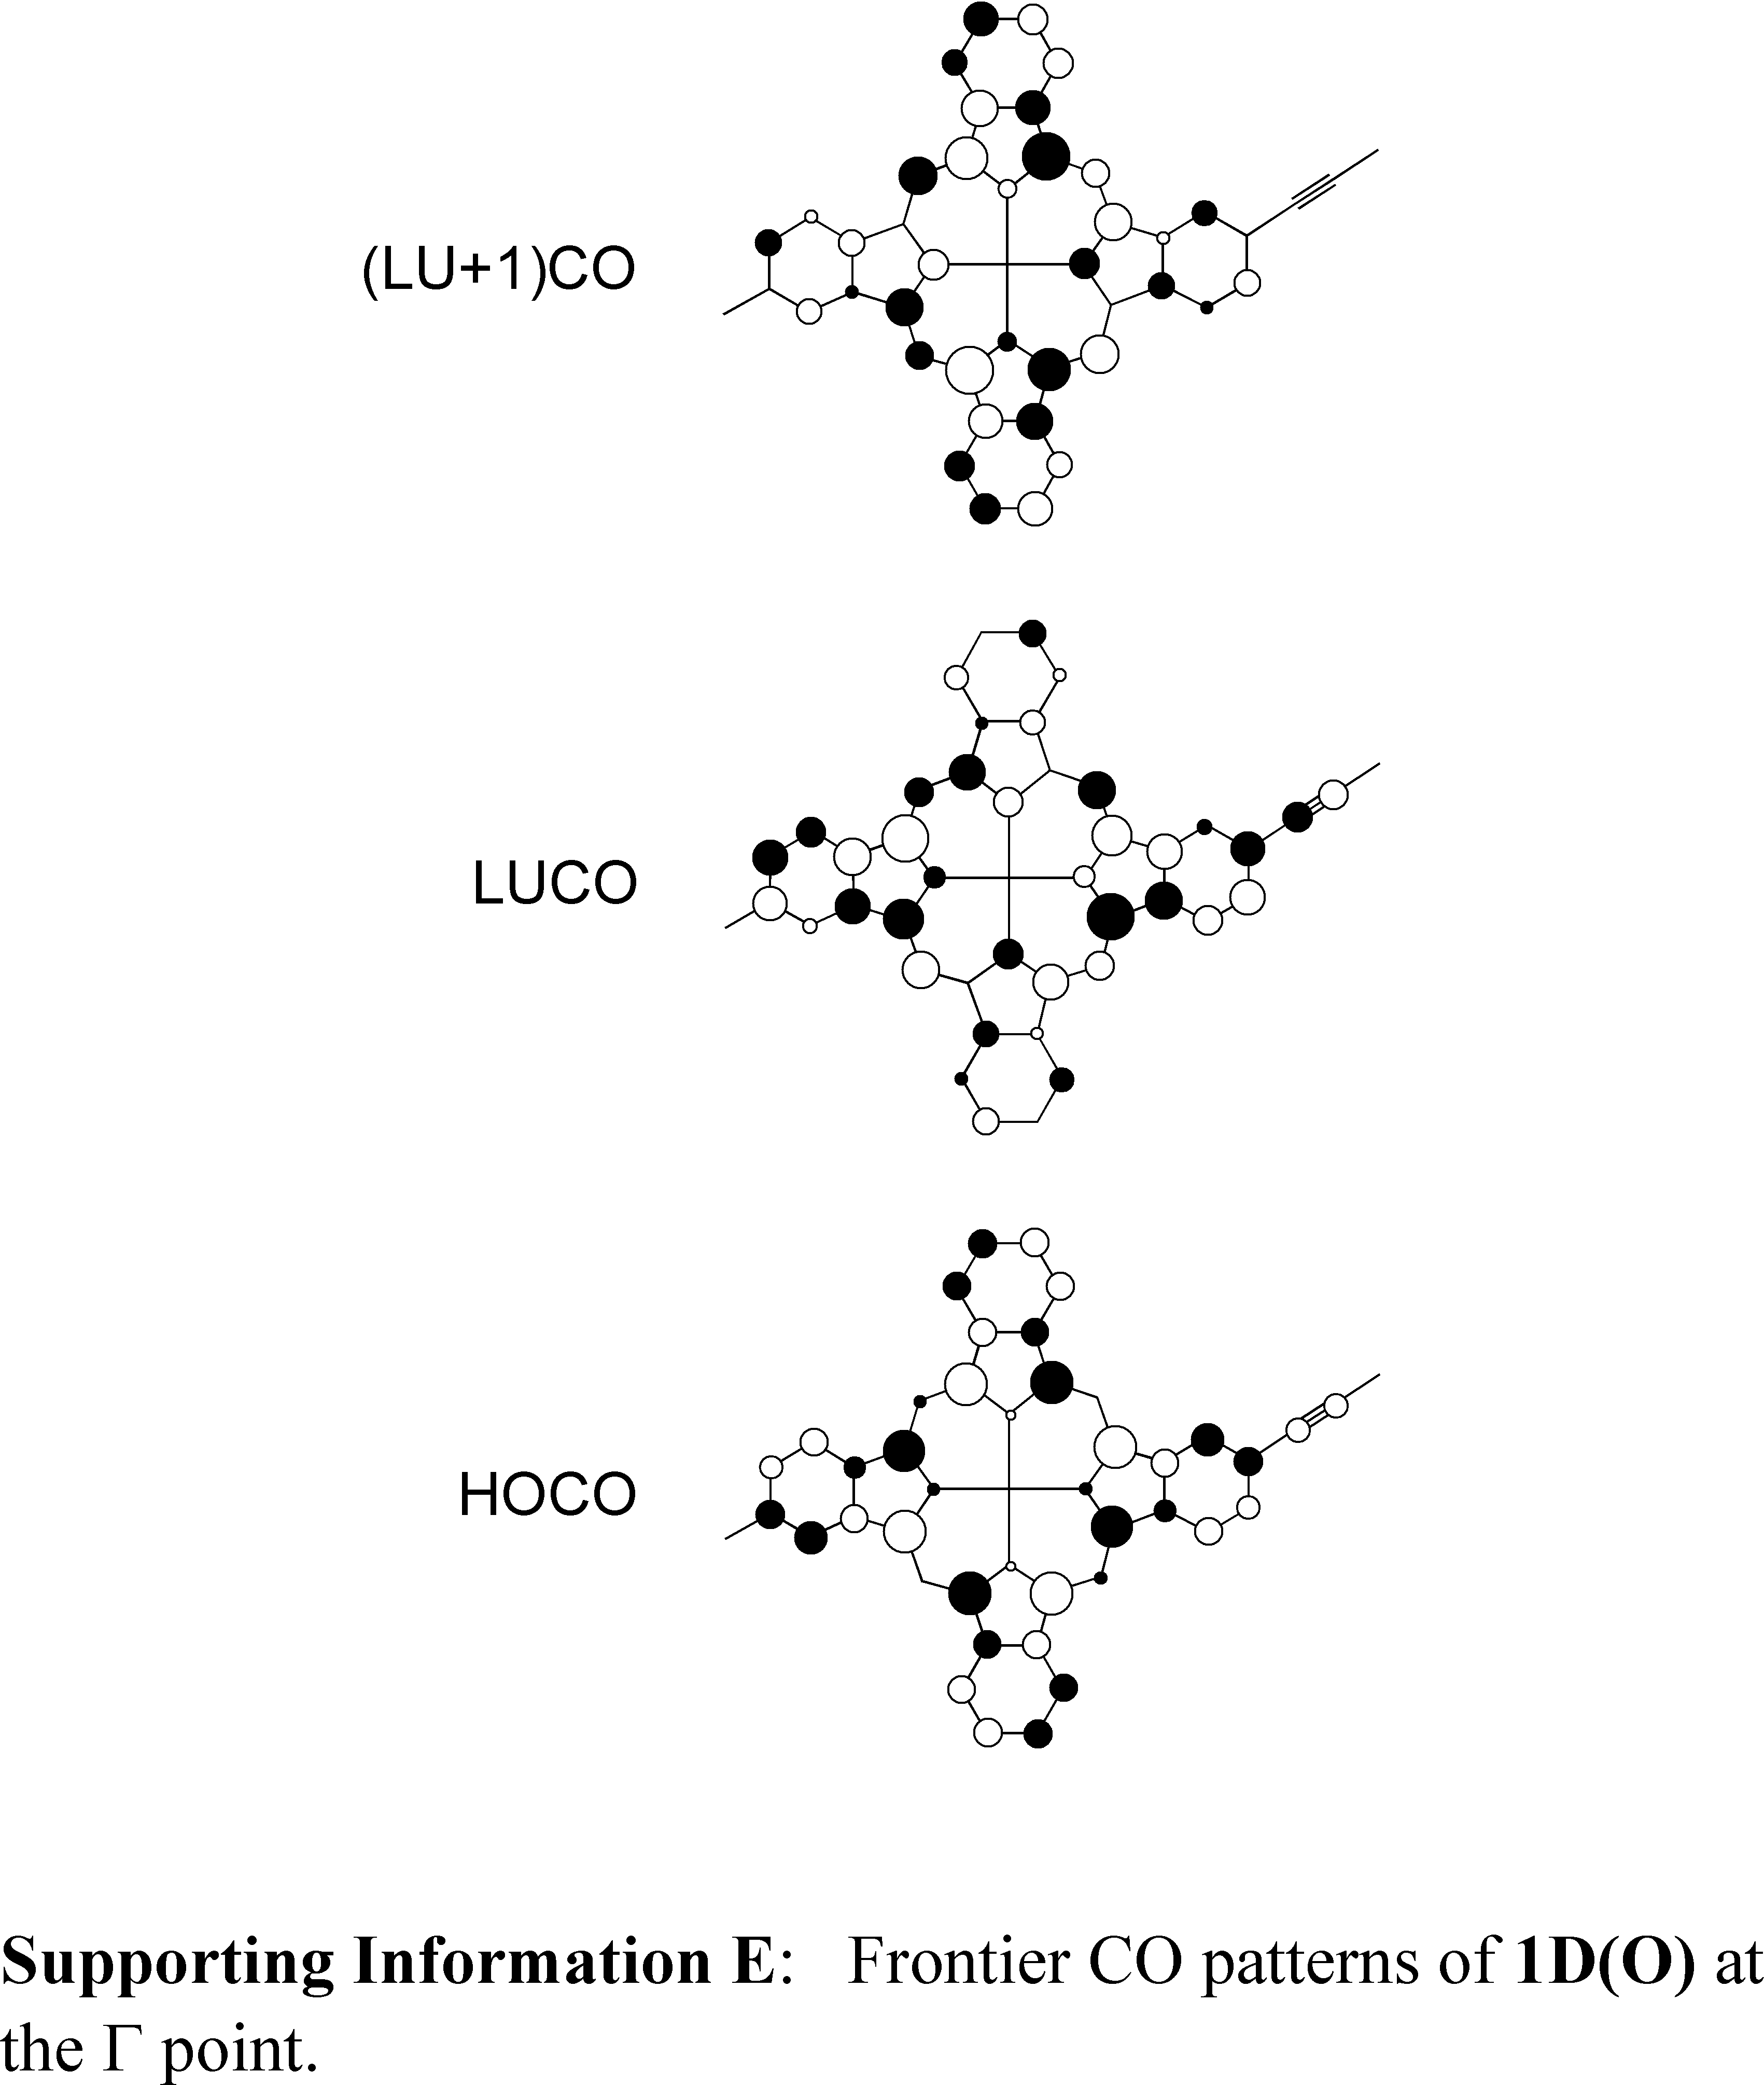

Supplement: b102614ne.doc [file b102614ne.doc]

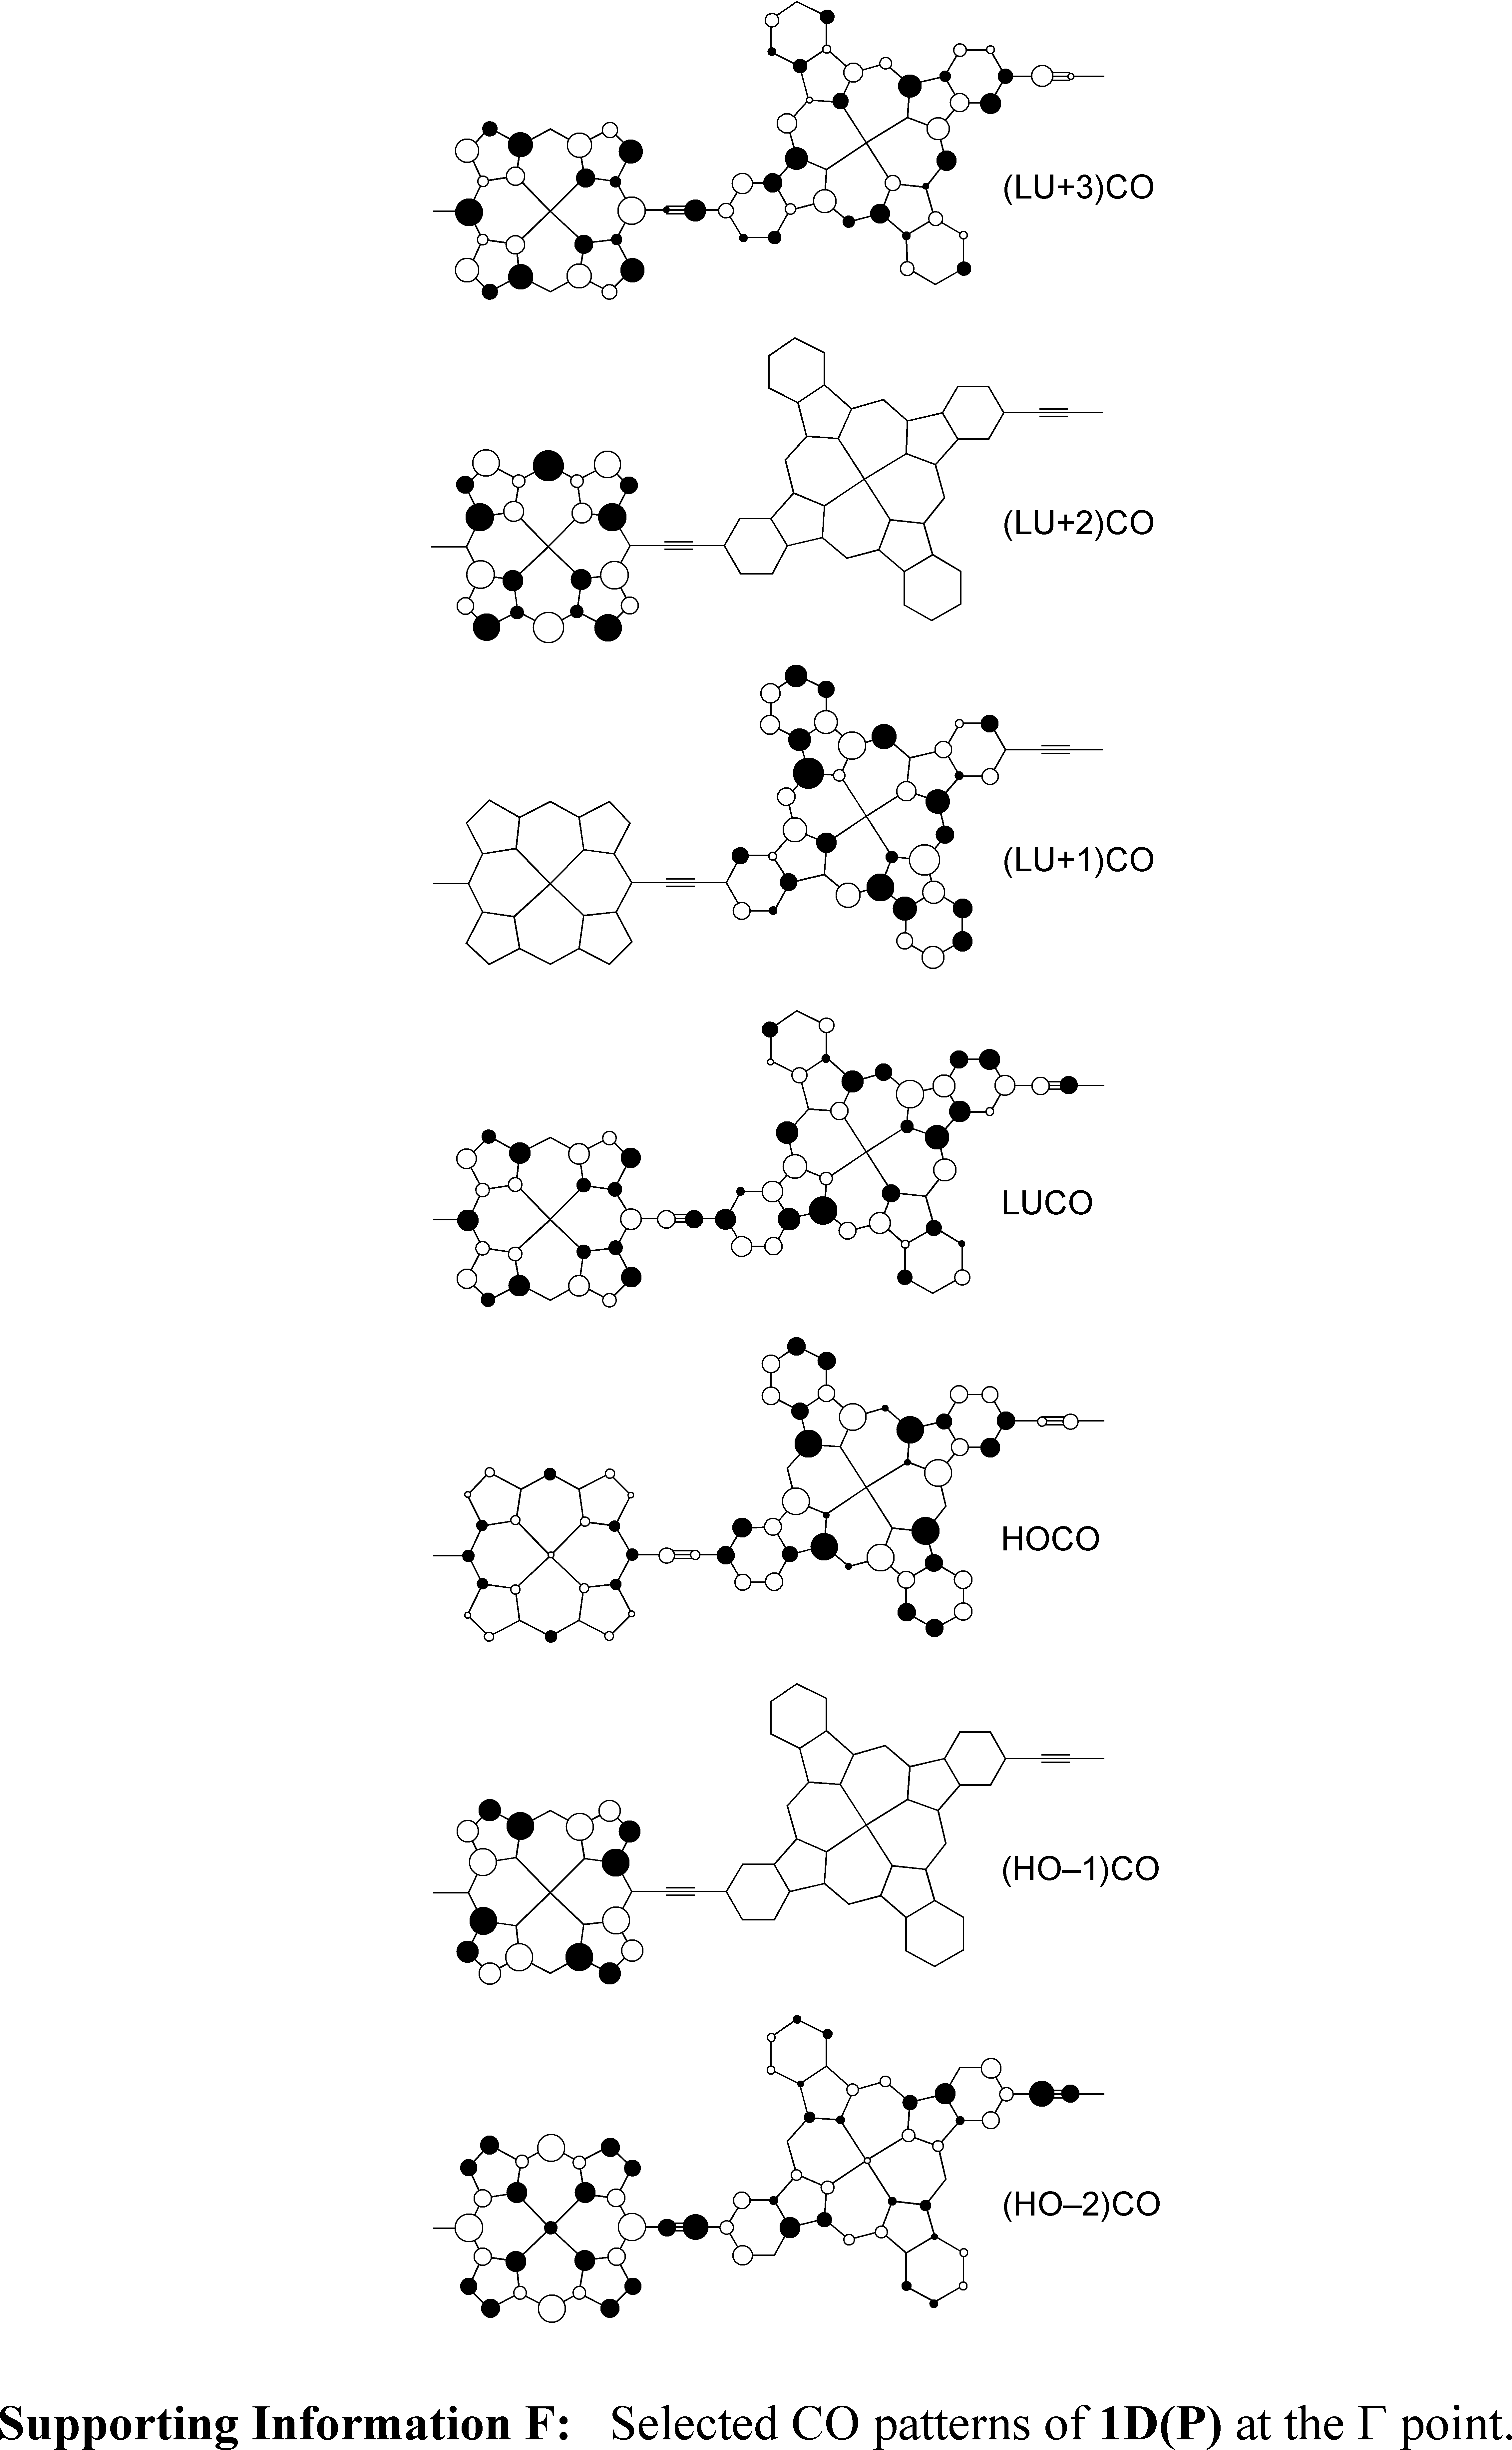

Supplement: b102614nf.doc [file b102614nf.doc]

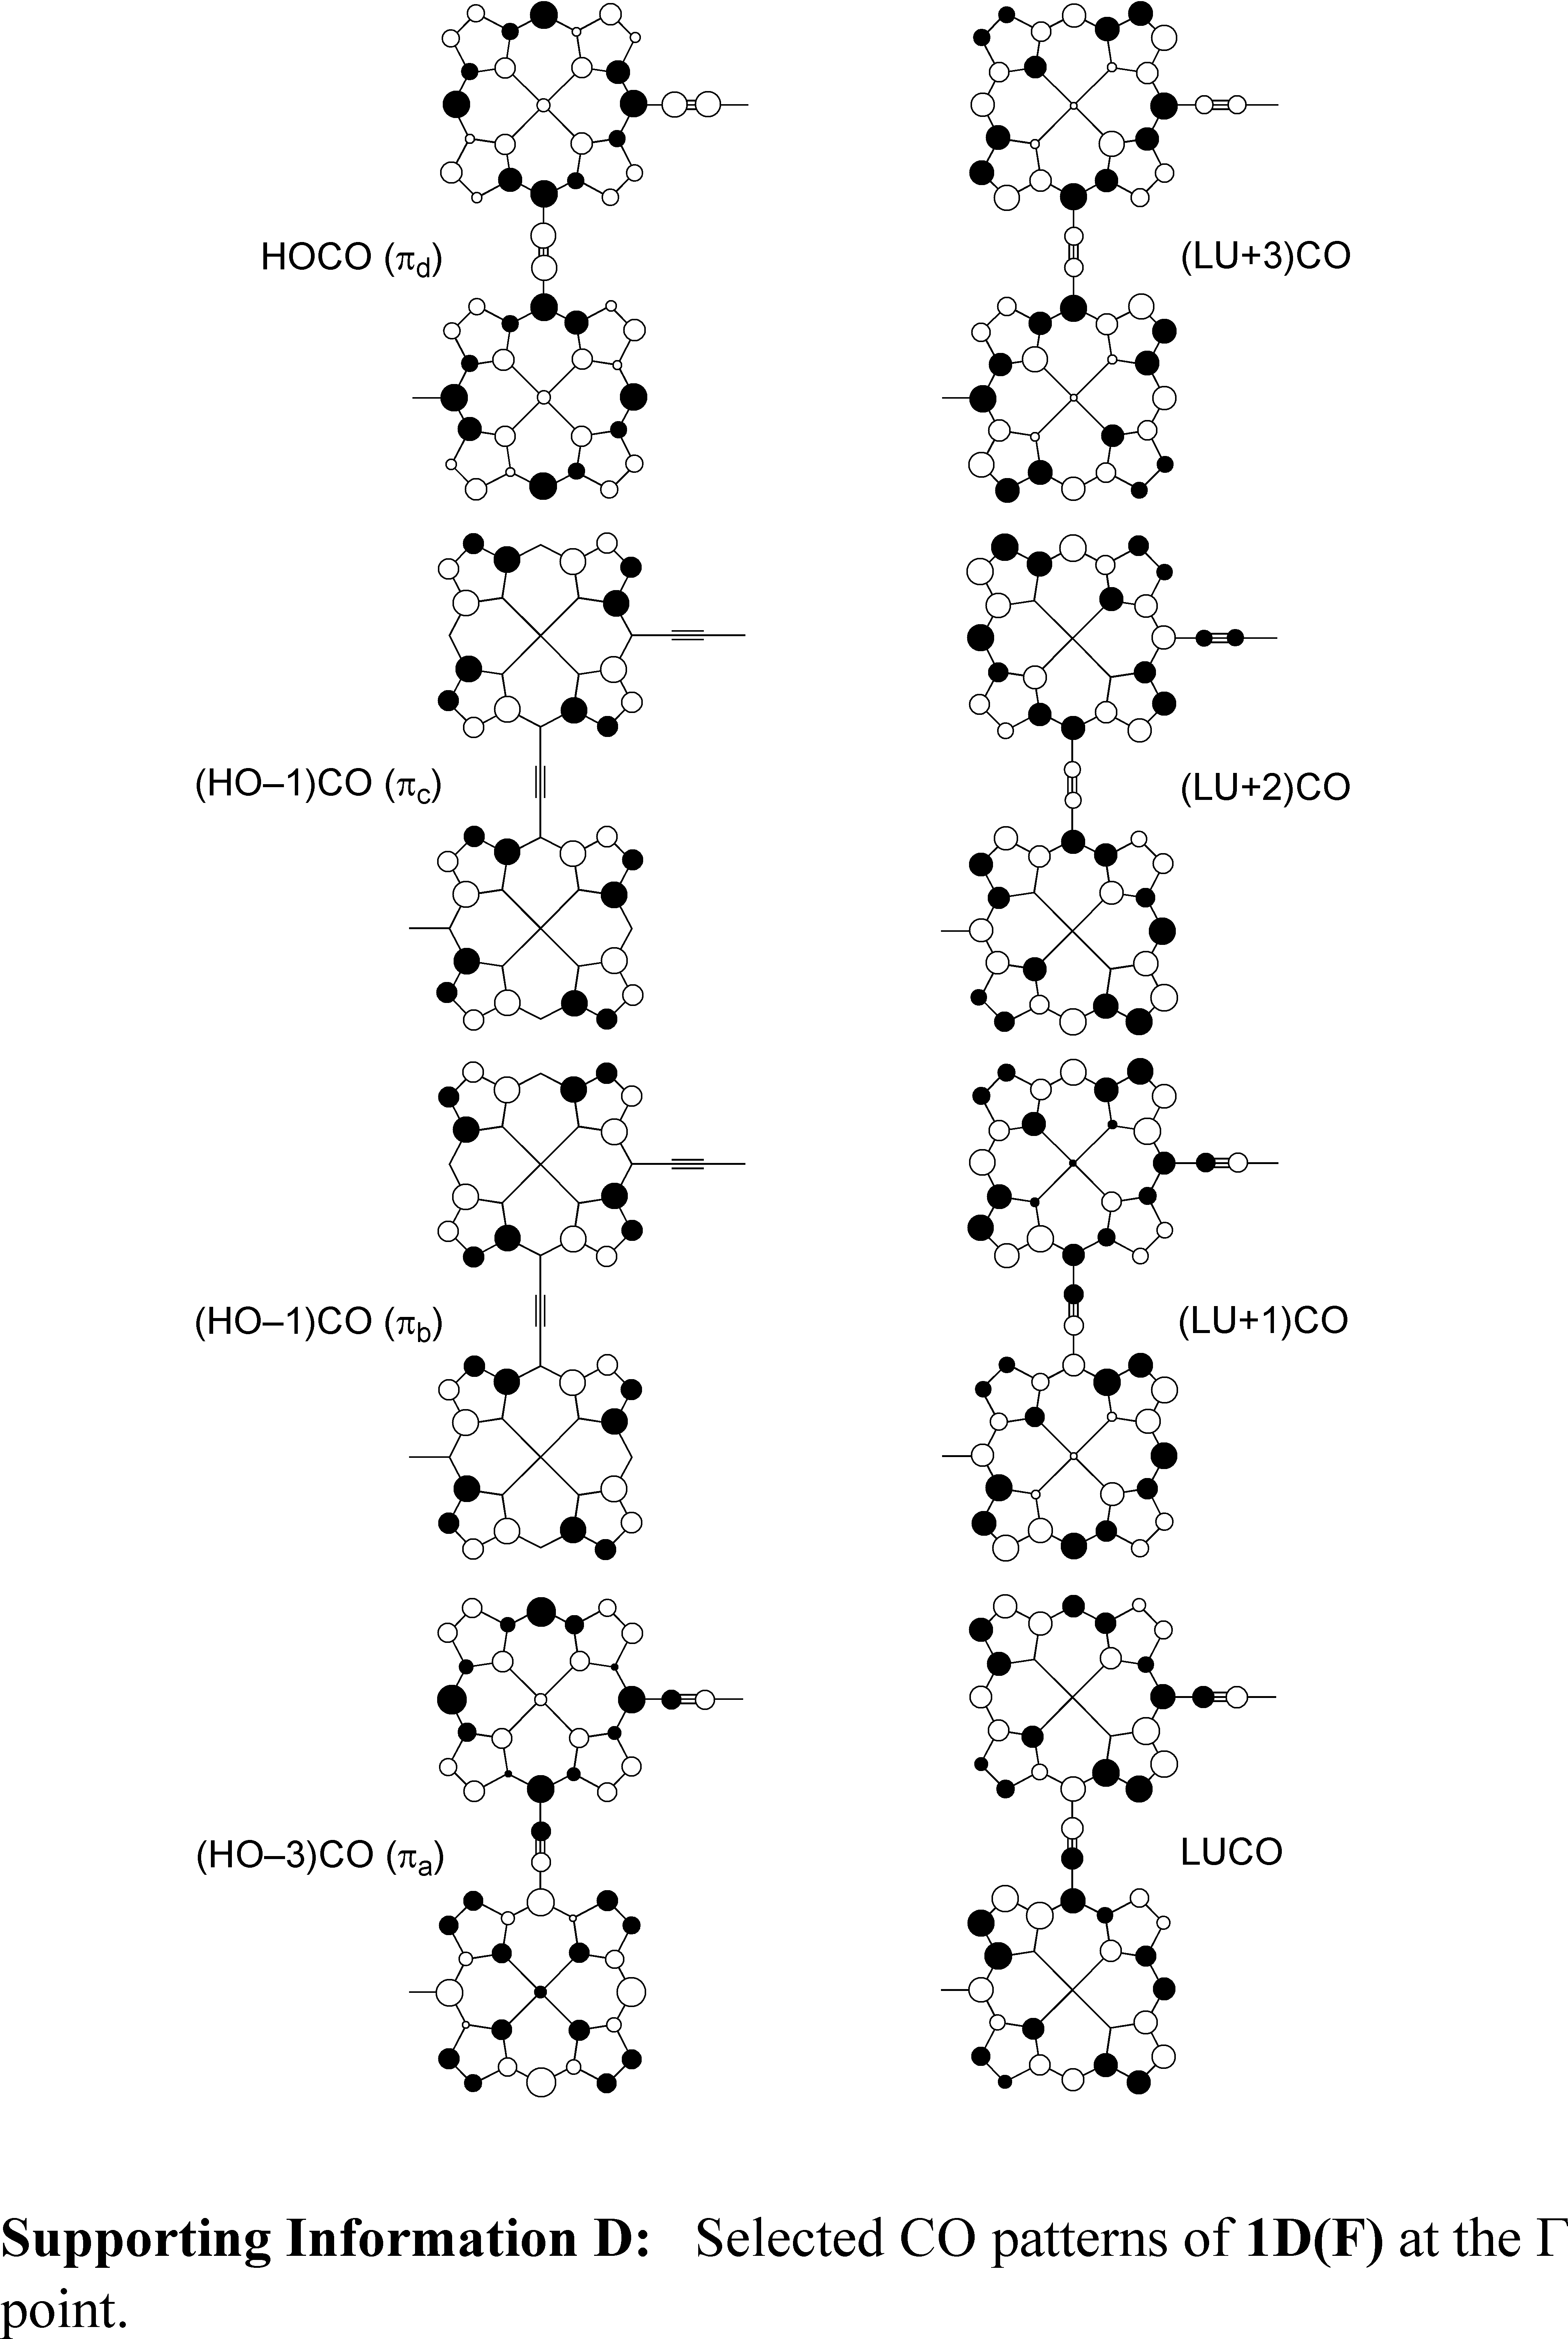

Supplement: b102614nd.doc [file b102614nd.doc]

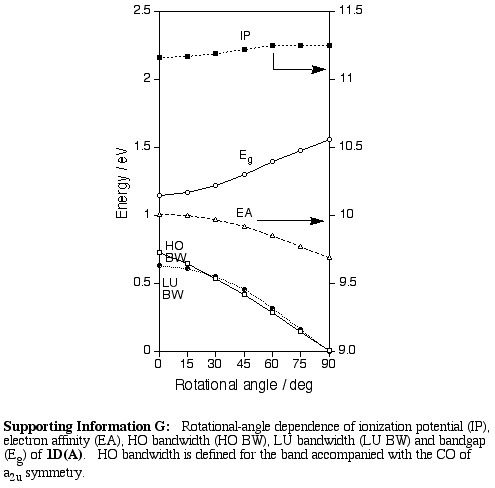

Supplement: b102614ng.doc [file b102614ng.doc]

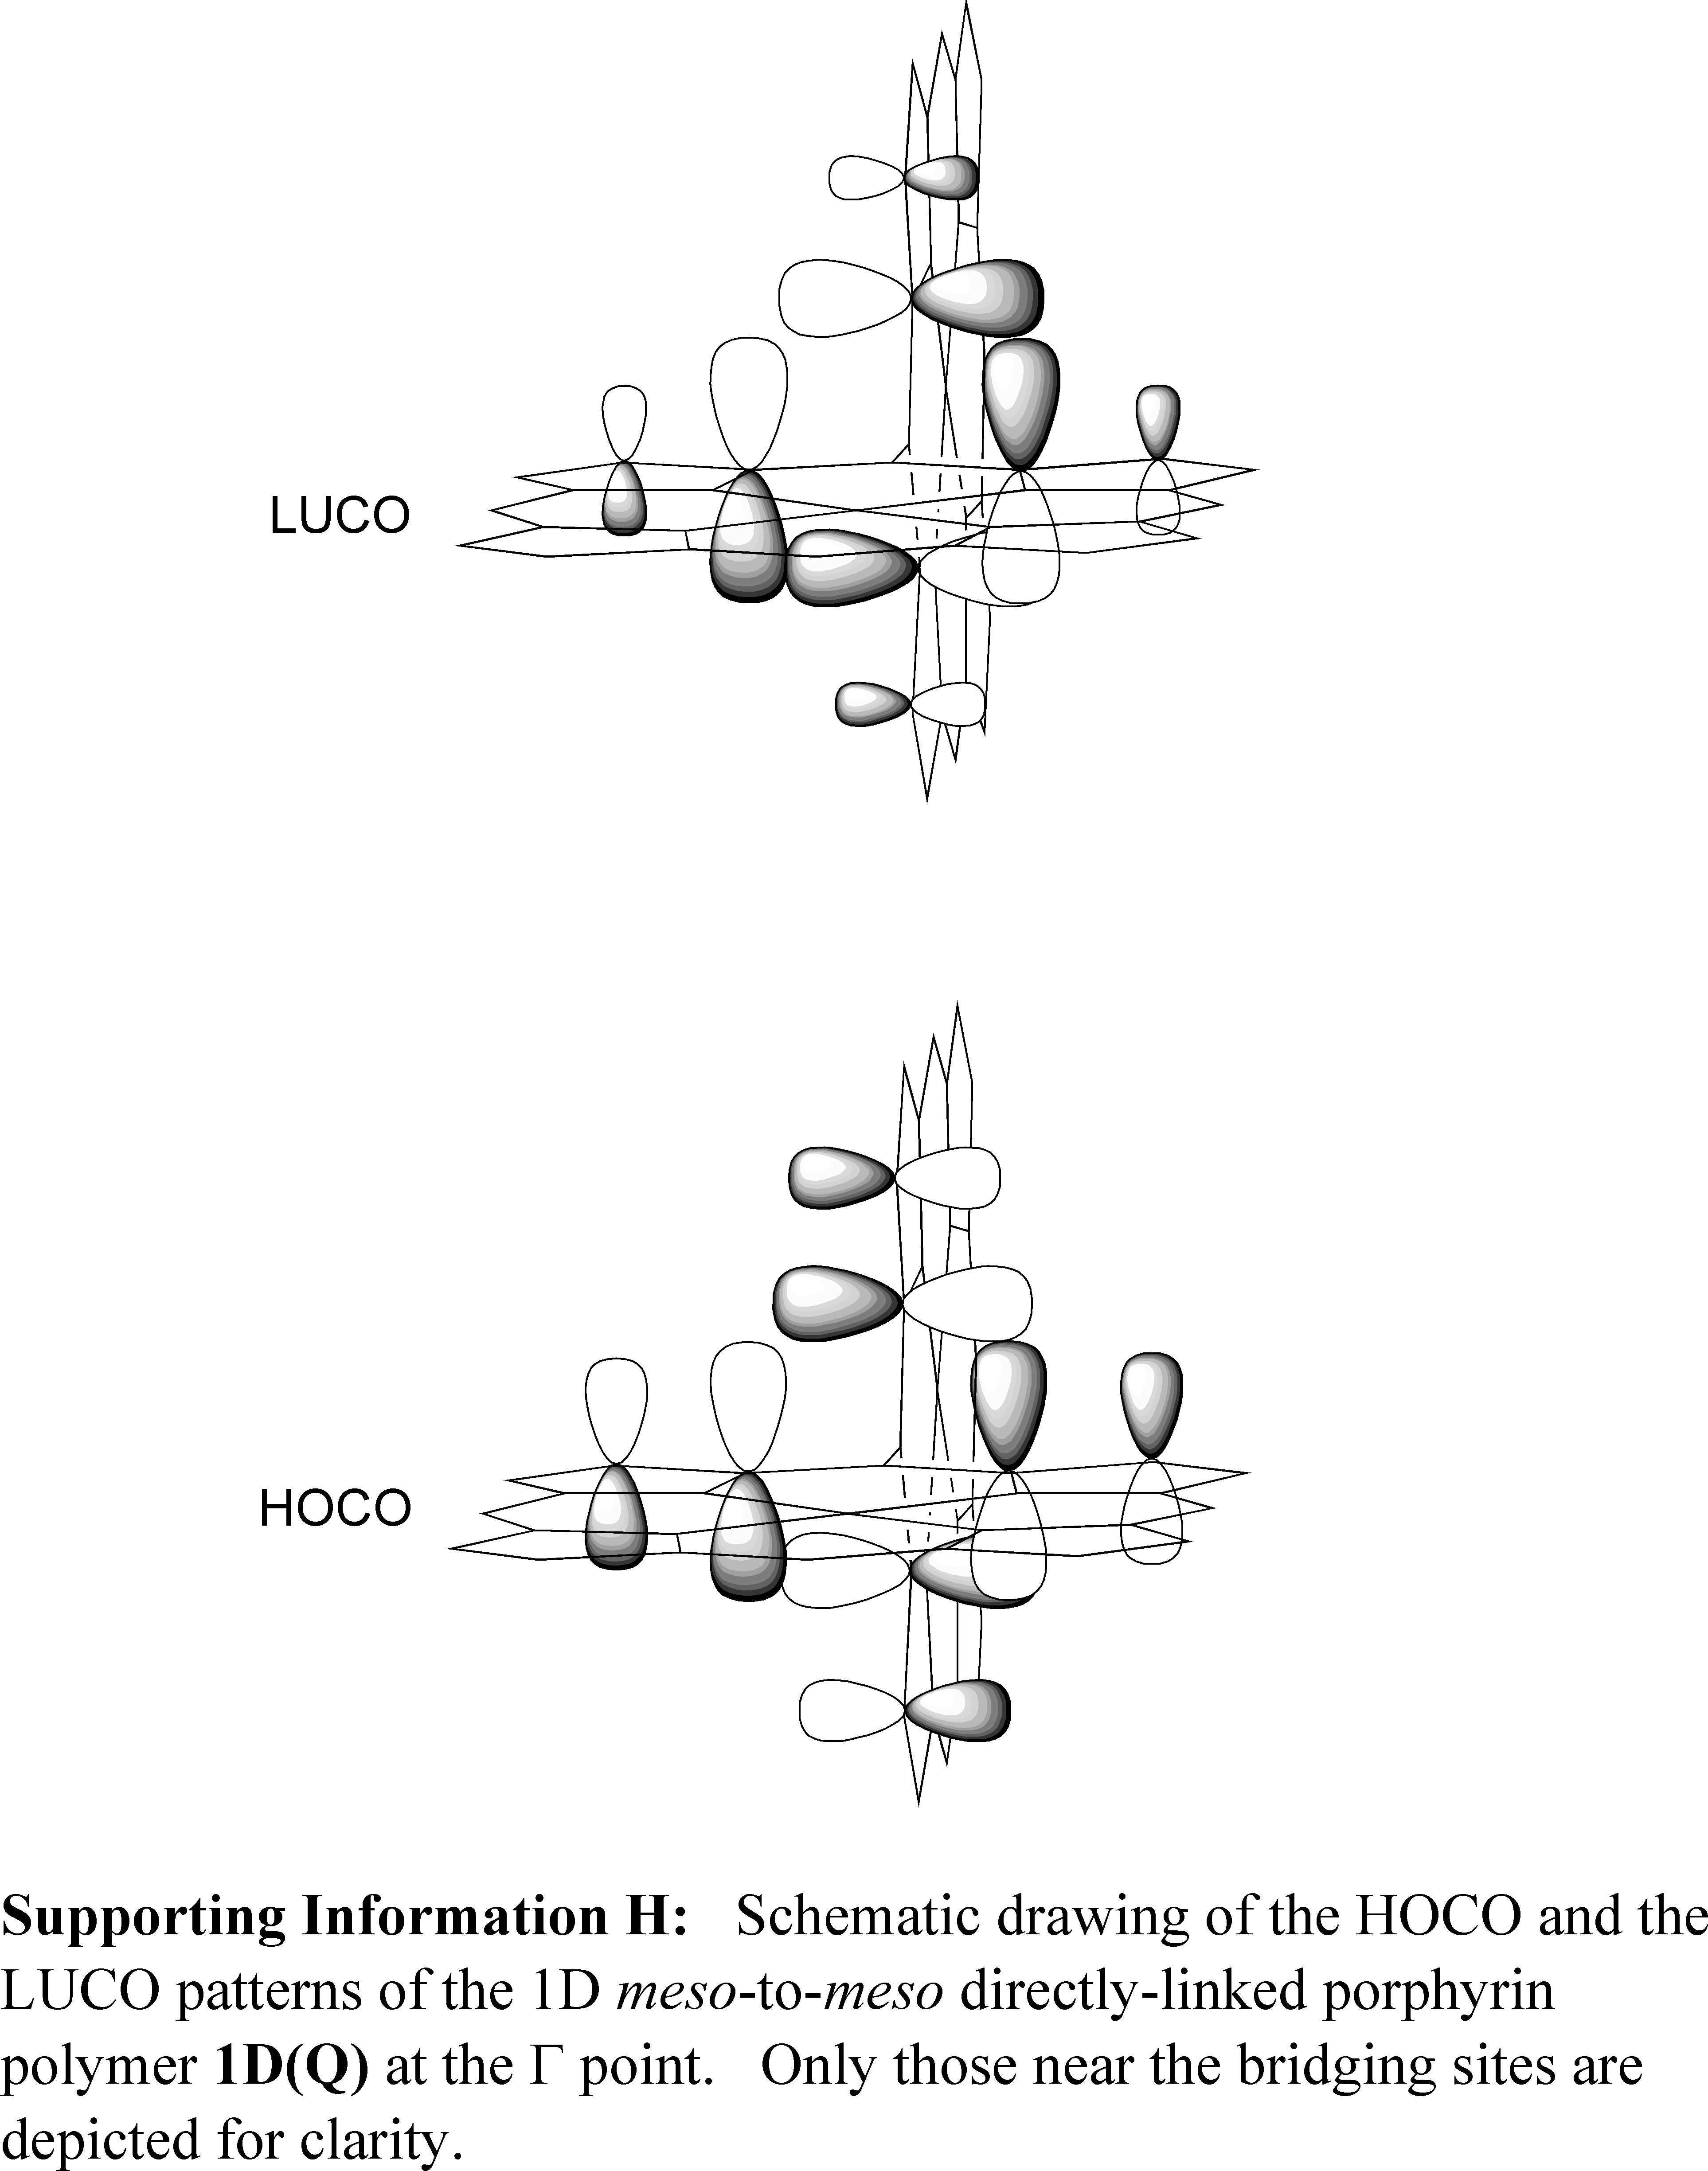

Supplement: b102614nh.doc [file b102614nh.doc]

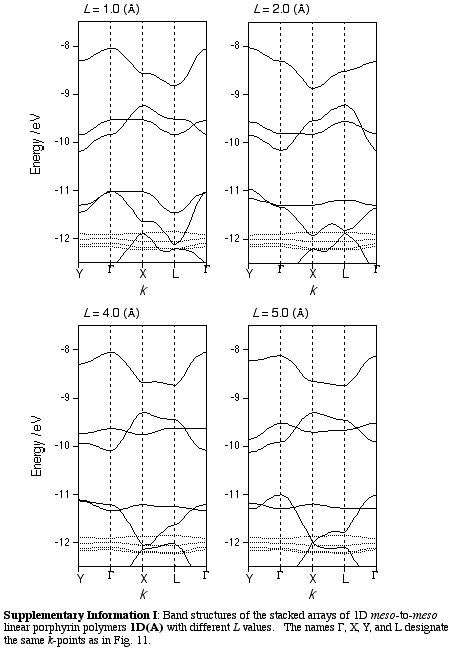

Supplement: b102614ni.doc [file b102614ni.doc]
